# Supplementary material
Source: PubMed Central journal article supplement (PMC4369676)
Supplement: NIHMS647593-supplement-2.pdf [file NIHMS647593-supplement-2.pdf]

## **Legends for videos**

**Video 1. NLRP3 in neutrophils given Signal 1 only.** Bone marrow derived neutrophils from C57BL/6 mice were incubated 3h with hkSP (Signal 1), and intracellular NLRP3 was detected by confocal microscopy using a monoclonal antibody to NLRP3 (clone EPR4777, Abcam). Note the diffuse distribution of NLRP3 (red) in the cytoplasm. Nuclei were stained with DAP (blue).

**Video 2. NLRP3 in neutrophils given Signal 1 and Signal 2.** Bone marrow derived neutrophils from C57BL/6 mice were incubated 3h with hkSP (Signal 1), followed by stimulation with live WT TIGR4, recombinant hemolytic pneumolysin (Ply) or with the inactive Ply toxoid (PdB) as Signal 2. Note the presence of NLRP3 as multiple discrete specks.
